# Supplementary material
Source: HighWire-hosted journal article supplement (https://thorax.bmj.com/content/71/11/988)
Supplement: inline-supplementary-material-1 [file inline-supplementary-material-1.pdf]

**ONLINE SUPPLEMENTARY FILE**

**Physical frailty and pulmonary rehabilitation in COPD: a prospective cohort study.**

Matthew Maddocks<sup>1</sup>, Samantha S.C. Kon<sup>2,3</sup>, Jane L. Canavan<sup>2,4</sup>, Sarah E. Jones<sup>2,4</sup>, Claire M.

Nolan<sup>2,4</sup>, Alex Labey<sup>2,4</sup>, Michael I. Polkey<sup>2</sup>, William D-C. Man<sup>2,4</sup>

**TABLE S1:** Fried model used to define frailty

| Characteristic        | Assessment                                                                                                                                                                                                                                                                                                                                                                               | Criteria                                                                                                                                                                                                                                                         |
|-----------------------|------------------------------------------------------------------------------------------------------------------------------------------------------------------------------------------------------------------------------------------------------------------------------------------------------------------------------------------------------------------------------------------|------------------------------------------------------------------------------------------------------------------------------------------------------------------------------------------------------------------------------------------------------------------|
| Shrinking             | Asked "In the last year, have you lost more than 10 pounds or $\geq 4.5$ kilograms unintentionally (i.e. not due to dieting or exercise)?"                                                                                                                                                                                                                                               | Responds "yes"                                                                                                                                                                                                                                                   |
| Exhaustion            | Using the CES-D Depression Scale, the following two statements are read. (a) I felt that everything I did was an effort; (b) I could not get going.<br><br>Asked "How often in the last week did you feel this way?"<br><br>0 = rarely or none of the time (<1 day), 1 = some or a little of the time (1-2 days), 2 = a moderate amount of the time (3-4 days), or 3 = most of the time. | Responds "2" or "3" to either question.                                                                                                                                                                                                                          |
| Low physical activity | Asked using the modified Minnesota Leisure-time Physical Activity Questionnaire about activities in the last week. Kilocalories (Kcal) expended are calculated using a standardized algorithm.                                                                                                                                                                                           | Males <383 Kcal<br><br>Females <270 Kcal                                                                                                                                                                                                                         |
| Slowness              | Four-metre gait speed test.                                                                                                                                                                                                                                                                                                                                                              | Males $\leq 173$ cm in height: $\leq 0.762$ m/s <sup>2</sup><br><br>Males >173 cm in height: $\leq 0.653$ m/s <sup>2</sup><br><br>Females $\leq 159$ cm in height: $\leq 0.762$ m/s <sup>2</sup><br><br>Females >159 cm in height: $\leq 0.653$ m/s <sup>2</sup> |
| Weakness              | Handgrip strength using a Jamar hand-held dynamometer. Maximum value over 3 tests on each hand, each separated by 30 seconds of rest.                                                                                                                                                                                                                                                    | Males BMI <24: $\leq 29$ kg<br><br>Males BMI 24.1-28: $\leq 30$ kg<br><br>Males BMI >28: $\leq 32$ kg<br><br>Females BMI <23: $\leq 17$ kg<br><br>Females BMI 23.1-26: $\leq 17.3$ kg                                                                            |

|  |  |                                                                              |
|--|--|------------------------------------------------------------------------------|
|  |  | Females BMI 26-29: $\leq 18\text{kg}$<br>Females BMI >29: $\leq 21\text{kg}$ |
|--|--|------------------------------------------------------------------------------|

Each characteristic is scored 0 or 1 if the criterion is met providing an overall score ranging 0-5. Using an ordinal scoring approach, patients with no criteria present are considered not-frail, those meeting 1-2 criteria are considered pre-frail, and those with  $\geq 3$  criteria present are considered frail.

**TABLE S2:** Characteristics of frail patients with COPD according to completion of pulmonary rehabilitation.

|                                                        | <b>Did not complete<br/>(n=94)</b> | <b>Completed<br/>(n=115)</b> | <b>p value</b> |
|--------------------------------------------------------|------------------------------------|------------------------------|----------------|
| Age (years)                                            | 71.9 (11.3)                        | 73.1 (8.6)                   | 0.39           |
| Male, n (%)                                            | 45 (47.9)                          | 65 (56.5)                    | 0.21           |
| Smoking status<br>current:former:never (%)             | 23.4: 70.2: 6.4                    | 8.7: 82.6: 8.7               | 0.018          |
| FEV1 % predicted                                       | 43.9 (19.7)                        | 48.3 (20.4)                  | 0.12           |
| MRC score                                              | 4.3 (0.8)                          | 3.9 (0.9)                    | 0.001          |
| Age-adjusted Charlson Score                            | 4.1 (1.6)                          | 4.3 (1.7)                    | 0.89           |
| ADO score                                              | 6.1 (1.7)                          | 5.8 (1.4)                    | 0.17           |
| BMI (kg/m)                                             | 27.5 (7.7)                         | 28.1 (7.5)                   | 0.59           |
| SMI (kg/m <sup>2</sup> )                               | 8.0 (1.9)                          | 8.2 (1.8)                    | 0.46           |
| Sarcopenia (%)                                         | 25.6 (17.7, 35.4)                  | 23.5 (16.7, 32.0)            | 0.81           |
| Handgrip (kg)                                          | 20.4 (9.9)                         | 21.9 (8.0)                   | 0.20           |
| Peak QMVC (kg)                                         | 20.1 (8.4)                         | 21.6 (8.2)                   | 0.26           |
| QMVC % predicted                                       | 49.3 (18.3)                        | 52.4 (15.8)                  | 0.24           |
| Below QMVC cut-point                                   | 48.6 (37.2, 60.0)                  | 40.8 (31.6, 50.7)            | 0.32           |
| 4MGS (m/s)                                             | 0.64 (0.21)                        | 0.68 (0.20)                  | 0.14           |
| ISWT (m)                                               | 89.4 (84.1)                        | 117.6 (92.1)                 | 0.023          |
| CRQ dyspnoea score                                     | 13.0 (5.4)                         | 12.4 (4.7)                   | 0.34           |
| CRQ fatigue score                                      | 11.2 (4.7)                         | 10.6 (4.5)                   | 0.32           |
| CRQ emotional score                                    | 26.2 (8.9)                         | 26.8 (10.0)                  | 0.64           |
| CRQ mastery score                                      | 14.4 (5.5)                         | 15.5 (5.8)                   | 0.18           |
| Self-reported weekly energy<br>expenditure (kcal)      | 179.8 (244.1)                      | 320.5 (558.5)                | 0.024          |
| Self-reported time in moderate<br>activity (mins/week) | 49.6 (67.5)                        | 93.1 (160.9)                 | 0.015          |
| CAT score                                              | 25.3 (7.7)                         | 24.7 (8.0)                   | 0.60           |
| KATZ score                                             | 5.4 (1.1)                          | 5.5 (0.9)                    | 0.26           |
| HADS anxiety                                           | 8.7 (5.0)                          | 8.0 (5.3)                    | 0.34           |
| HADS depression                                        | 8.4 (3.8)                          | 8.1 (4.1)                    | 0.58           |
| <i>Frailty characteristic<br/>(% meeting criteria)</i> |                                    |                              |                |
| Unintentional weight loss                              | 26.6 (18.7, 36.3)                  | 24.3 (17.4, 32.9)            | 0.71           |
| Exhaustion                                             | 85.1 (76.5, 90.9)                  | 81.7 (73.7, 87.7)            | 0.52           |
| Low physical activity                                  | 84.0 (75.3, 90.1)                  | 77.4 (68.9, 84.1)            | 0.23           |
| Slow gait speed                                        | 73.4 (63.7, 81.3)                  | 71.3 (62.5, 78.8)            | 0.74           |
| Weak handgrip strength                                 | 79.6 (70.3, 86.5)                  | 81.7 (73.7, 87.7)            | 0.69           |

Values are mean (SD) or proportions (95% confidence interval). Legend: 4MGS = 4-metre gait speed, BMI = body mass index, CAT = COPD Assessment Test, CRQ = Chronic Respiratory Disease Questionnaire, FEV<sub>1</sub> – Forced expiratory volume in one second, HADS = Hospital Anxiety and Depression scale, ISWT = incremental shuttle walk test, kcal = kilocalorie, MRC = Medical Research Council, QMVC = quadriceps maximum voluntary contraction, SMI = skeletal muscle index.
